# Supplementary material
Source: Research Square preprint supplement (doi:10.21203/rs.3.rs-9814545/v1)
Supplement: Supplementary file 1 [file 5150de914b5188fb575d470e.docx]

Appendix

Expanding on the list of Convection / Conduction play type & Reservoir

# Level 1

## Pantelleria

Pantelleria Island is classified as a Magmatic Extrusive Play (CV1a). It is located in the Sicilian Channel, between Sicily and the African continental margin, and represents the emergent portion of a volcanic edifice rising approximately 836 m above sea level. The island and its surrounding region are considered volcanically active; notable recent events along the Pantelleria Rift include the eruption of Graham Bank in 1881 and a submarine eruption in 1891, a few kilometers northwest of the island. At present, numerous thermal springs and small fumaroles emitting steam are distributed across the island (Wright, 1980).

The heat-flow distribution map by Della Vedova et al. (2001) indicates high-temperature convective systems underneath the island. Isotherms over 100 °C, hydrothermal manifestations reaching up to 100 °C at the surface, and shallow borehole data showing temperatures as high as 250 °C at depths of 750 to 1200 m all strongly suggest a major thermal anomaly (Buonasorte et al., 2011).

| Geothermal Play Code | Geothermal Play Name | Conduction/Convection Type | Geothermal Play Type | Plate Tectonic Setting | Geologic Habitat | Geologic Controls |
| --- | --- | --- | --- | --- | --- | --- |
| ITG1_CV1a_1 | Pantelleria | CV1a | Volcanic | Mid Oceanic Ridge (MOR) | Recent magmatism | Magmatic |

## Aeolian Arc

The Aeolian Arc, classified as a Magmatic Extrusive Play (CV1a), is an active volcanic arc in the southern Tyrrhenian Sea and a typical example of subduction-related magmatism. According to the geodynamic model proposed by Peccerillo et al. (2017), the Tindari–Letojanni fault system is a major structural boundary that separates the actively subducting Ionian oceanic plate and its associated sedimentary cover from a western domain characterized by a discontinuous, largely aseismic crustal block.

The heat-flow distribution map by Della Vedova et al. (2001) highlights high-temperature convective systems within the Aeolian Arc. A pronounced thermal anomaly affecting the surrounding seafloor along the entire volcanic arc is indicated by isotherms exceeding 100 °C.

| Geothermal Play Code | Geothermal Play Name | Conduction/Convection Type | Geothermal Play Type | Plate Tectonic Setting | Geologic Habitat | Geologic Controls |
| --- | --- | --- | --- | --- | --- | --- |
| ITG1_CV1a_2 | Aeolian Arc | CV1a | Volcanic | Magmatic Arc | Active magmatism | Magmatic |

## Phlegraean Fields

Located along the northwestern margin of the Gulf of Naples, the Phlegraean Fields caldera (CFc) is a volcanic depression about 12 km in diameter. The most recent eruption occurred in 1538, forming the Monte Nuovo crater. Since Roman times, the area has been known as the “burning fields,” reflecting its long-recognized volcanic and hydrothermal activity (Belkin et al., 2024).

The Phlegraean Fields are classified as a Magmatic Extrusive Play (CV1a), characterized by extensive surface manifestations, including hot springs and fumaroles. The heat-flow map by Della Vedova et al. (2001) highlights high-temperature convective systems beneath the caldera. Exploration drilling has confirmed a water-dominated geothermal system with reservoir temperatures around 200 °C and relatively high pressures (Carlino et al., 2012).

The geothermal system is typically described as consisting of three main reservoirs. A shallow hydrothermal reservoir (<1 km depth) is characterized by low- to medium-temperature fluids and intense fumarolic and degassing activity. An intermediate reservoir at depths of approximately 1–2 km hosts liquid-dominated conditions with temperatures of 150–200 °C. At greater depths (>2–3 km), a deeper, hotter reservoir is inferred, likely associated with magmatic fluids and partial vapor-dominated conditions, representing the primary heat source driving hydrothermal circulation within the caldera (Marini et al., 2025; Siniscalchi et al., 2019; Chiodini et al., 2022).

| Geothermal Play Code | Geothermal Play Name | Conduction/Convection Type | Geothermal Play Type | Plate Tectonic Setting | Geologic Habitat | Geologic Controls |
| --- | --- | --- | --- | --- | --- | --- |
| ITF3_CV1a_3 | Phlegraean  Fields | CV1a | Volcanic | Shallow magma chambers | Active magmatism | Magmatic |

## Latium area

The Latium region lies within the central sector of the Tuscany–Latium–Campania pre-Apennine belt, an area marked by significant heat-flow anomalies caused by crustal thinning and mantle upwelling linked to complex geodynamic and volcano-tectonic processes that have shaped the region over the past few million years (Buonasorte et al., 2011). The area hosts several volcanic districts, collectively classified as a Magmatic Extrusive Play (CV1a). Heat-flow distribution maps reveal high-temperature convective systems throughout the region (Della Vedova et al., 2001).

The Vulsini Volcanic District, the northernmost volcanic district of Latium, is geologically linked to post-Miocene extensional tectonics (Ciotoli et al., 2003). The district covers approximately 2300 km² and developed through polyphasic volcanic activity associated with three main eruptive centers: Bolsena and Montefiascone in the eastern sector and Latera in the western sector (Ciotoli et al., 2003). Deep wells in the district recorded temperatures of about 150 °C at depths of around 2 km, confirming the presence of a potentially significant geothermal reservoir (Buonasorte et al., 2011).

Thermal investigations in the Monti Sabatini–Cesano district in the late 1970s revealed a laterally extensive reservoir with temperatures ranging from 60 to 90 °C at depths of 1 to 3 km (Buonasorte et al., 2011).

Elevated temperatures exceeding 90 °C are also observed in the Tiber Valley, the Rome area, and the Alban Hills volcanic district (Buonasorte et al., 2011). In these areas, hydrothermal circulation is facilitated by permeable horizons within the volcanic cover, as evidenced by widespread hypo- and mesothermal springs (Carlino et al., 2012).

| Geothermal Play Code | Geothermal Play Name | Conduction/Convection Type | Geothermal Play Type | Plate Tectonic Setting | Geologic Habitat | Geologic Controls |
| --- | --- | --- | --- | --- | --- | --- |
| ITI4_CV1a_4 | Latium_Area | CV1a | Volcanic | Shallow magma chamber | Recent magmatism | Magmatic |

## Mt. Amiata

The geothermal play at Mt. Amiata is located in Tuscany, on the western flank of the Apennine chain, within a typical extensional tectonic setting. Currently, this area hosts geothermal leases for power generation and direct heating applications.

Mt. Amiata is a young, extinct volcano (age 0.3-0.2 Myr) (Santilano et al. 2015). Based on geophysical evidence, the heat source of the geothermal system is presumed to be a granitoid intrusion intermixed with mafic magmas at a depth of approximately 4 kilometers (Sbrana et al. 2020). It has been classified as a Plutonic & no Volcanism play (CV2b). In this area, there are two high-enthalpy geothermal reservoirs, both water-dominated. The shallow reservoir is hosted in the carbonate and evaporitic formations of the Tuscan Nappe and shows temperatures between 150 and 230 °C. The deep reservoir is hosted in a fractured thermal layer within the metamorphic basement, where temperatures range from above 300 °C to 350 °C (Barelli et al. 2010; Fulignati et al. 2014; Sbrana et al. 2020). The low-permeability phyllite layers of the regional metamorphic basement separate the two geothermal reservoirs. Currently, only the deep reservoir is utilized for energy production (Sbrana et al. 2020).

| Geothermal Play Code | Geothermal Play Name | Conduction/Convection Type | Geothermal Play Type | Plate Tectonic Setting | Geologic Habitat | Geologic Controls |
| --- | --- | --- | --- | --- | --- | --- |
| ITI1_CV2b_5 | Mt. Amiata | CV2b | Plutonic | Young intrusion + Extension | Recent plutonism | Magmatic + Active faulting |

## Larderello

The geothermal play at Larderello is located in Tuscany, on the western flank of the Apennine chain, within a typical extensional tectonic setting. Currently, this area hosts geothermal leases for power generation and direct heating applications.

The geothermal gradient in the Larderello–Travale system exceeds 100 °C/km and can reach up to 300 °C/km (Romagnoli et al. 2010; Montanari et al. 2023), supporting the industrial use of geothermal resources for over 200 years. Currently, industrial applications harness two main, partially connected geothermal reservoirs: a shallow one and a deeper one. The shallow reservoir is hosted within the Triassic evaporites and carbonates of the Tuscan Units at depths of 0.7-1 km; geothermal fluids reach temperatures of 150–260 °C and a maximum pressure of 3.2 MPa. The deep reservoir is situated within Paleozoic metamorphic units and Neogene-Quaternary granitoids at depths of 2.5 to 4 km. This reservoir contains superheated steam at temperatures between 300 and 350 °C and pressures between 4 and 7 MPa. Both reservoirs are overlain by nearly impermeable shaly formations of the Ligurian Complex and by Neogene-Quaternary infill of the hinterland basins (Batini et al. 2003). It has been classified as a Plutonic & no Volcanism play (CV2b).

| Geothermal Play Code | Geothermal Play Name | Conduction/Convection Type | Geothermal Play Type | Plate Tectonic Setting | Geologic Habitat | Geologic Controls |
| --- | --- | --- | --- | --- | --- | --- |
| ITI1_CV2b_6 | Larderello | CV2b | Plutonic | Young intrusion + Extension | Recent plutonism | Magmatic + Active faulting |

## Marsili and Vavilov

The Marsili and Vavilov seamounts are categorized as a Magmatic Extrusive Play (CV1a). These submarine volcanoes are situated in the southern Tyrrhenian Sea, which is recognized as the youngest back-arc basin in the Mediterranean. Its formation is associated with crustal extension and thinning, linked to the subduction of the Ionian oceanic lithosphere beneath the Calabrian Arc. This occurs within a broader convergent context between the African and Eurasian plates (Marani et al. 2024, and references therein).

During the Pliocene, oceanic crust formation was localized within the Vavilov back-arc basin, where the Vavilov Seamount developed. Subsequently, oceanic crust production migrated eastward, resulting in the formation of the Marsili back-arc basin (ca. 1.9–1.7 Ma) and, later, the Marsili volcano (<0.73 Ma) (Marani et al., 2024 and references therein).

The heat-flow distribution map of Della Vedova et al. (2001) highlights high-temperature convective systems in these areas. The main edifice of the Marsili submarine volcano is inferred to host a large, high-temperature hydrothermal system. Because the summit of the volcanic structure lies less than 1 km below sea level, the site has attracted interest for geothermal exploration (Buonasorte et al., 2011).

| Geothermal Play Code | Geothermal Play Name | Conduction/Convection Type | Geothermal Play Type | Plate Tectonic Setting | Geologic Habitat | Geologic Controls |
| --- | --- | --- | --- | --- | --- | --- |
| SEA_CV1a_7 | Marsili Seamount | CV1a | Volcanic | Back-arc basin | Active magmatism | Magmatic |
| SEA_CV1a_8 | Vavilov Seamount | CV1a | Volcanic | Back-arc basin | Active magmatism | Magmatic |

## Pre-Apennines tosco-laziale belt

The Tuscany–Latium pre-Apennine belt is classified as an Extensional Play (CV3) and hosts significant geothermal resources associated with regional heat-flow anomalies linked to crustal thinning and extensional tectonics (Buonasorte et al., 2007). In Tuscany, excluding the main geothermal fields already in exploitation, a laterally continuous potential reservoir is recognized at depths of approximately 0.5 to 1 km across the region south of the Arno River (Buonasorte et al., 2011). At these depths, temperatures are generally estimated to be at least 50 °C, while at depths of around 2 km they commonly exceed 90 °C (Buonasorte et al., 2011).

Several areas are particularly promising for developing medium- to low-temperature geothermal resources for direct use. These include the Pisa–Pontedera area (50–60 °C at depths less than 1 km), the Siena–Acqua Borra sector (approximately 70 °C at ~700 m depth), and the Roccastrada area (about 75 °C at ~1 km depth) (Buonasorte et al., 2011). The pre-Apennine sector of Latium represents the southward extension of the regional geothermal anomaly identified in southern Tuscany. This area is characterized by widespread volcanic activity that developed between approximately 2 and 1 Ma (Buonasorte et al., 2011). The Monti Cimini, Monti della Tolfa, and Monti Ceriti volcanic districts are part of this system and are genetically linked to the Tuscan Magmatic Province (Buonasorte et al., 2011). In this southernmost part of Latium, geothermal fluids are hosted in Mesozoic carbonate reservoirs, where several sites exhibit elevated temperatures, including Latina (approximately 60 °C at 1.4 km depth), Fogliano (about 80 °C at 1 km), Valle Latina (50–70 °C at depths of 1–2 km), and the area near the Suio thermal baths (50–100 °C at depths of 0.5–1 km) (Buonasorte et al., 2011).

| Geothermal Play Code | Geothermal Play Name | Conduction/Convection Type | Geothermal Play Type | Plate Tectonic Setting | Geologic Habitat | Geologic Controls |
| --- | --- | --- | --- | --- | --- | --- |
| ITI1_CV3_13 | Pre-Apennines  tosco-laziale belt | CV3 | Extensional domain | Thinned crust- elevated heatflow | Active extensional domain | Fault/ fracture controlled |

## North Sardinia

Northern Sardinia is classified as an Extensional Play (CV3). A significant heat-flow anomaly has been documented in northwestern Sardinia. The highest recorded temperatures (up to 75 °C) occur within the Casteldoria granite at the intersection of two oblique normal faults, which serve as primary pathways for fluid circulation. Historical wells drilled in the 1950s revealed widespread thermal upwelling along the area's principal fault systems, underscoring the strong structural control on fluid flow. Geochemical analyses of the waters indicate that the geothermal reservoir is hosted in granitic rocks at depths exceeding 2 km. In contrast, boreholes drilled in areas adjacent to Casteldoria have encountered lower-temperature waters (approximately 28 °C). These wells penetrate a thick sequence of Oligocene-Aquitanian sandy conglomerates overlying the Variscan basement, suggesting a shallower, less thermally evolved hydrogeological system.

| Geothermal Play Code | Geothermal Play Name | Conduction/Convection Type | Geothermal Play Type | Plate Tectonic Setting | Geologic Habitat | Geologic Controls |
| --- | --- | --- | --- | --- | --- | --- |
| ITG2_CV3_24 | North Sardinia | CV3 | Basement type | Heat producting element rock | Petrothermal | Fault/ Fracture controlled |

## Etna

Mount Etna, a late Quaternary polygenetic volcano, is classified as a Magmatic Extrusive Play (CV1a). It lies at the boundary between the Gela–Catania foredeep and the tectonic structures associated with the Sicilian–Maghrebian collision zone (Barreca et al., 2018).

The heat-flow distribution map of Della Vedova et al. (2001) highlights high-temperature convective systems in the Etna region, with temperatures of 70–90 °C recorded at depths of about 2 km. In the Paternò area, a temperature of 98 °C was measured at a depth of 1150 m in low-permeability rocks.

The upwelling of hydrothermal fluids in the Etna system is likely partially obscured by a shallow groundwater system composed of relatively cold water circulating through highly permeable volcanic rocks (Buonasorte et al., 2011).

| Geothermal Play Code | Geothermal Play Name | Conduction/Convection Type | Geothermal Play Type | Plate Tectonic Setting | Geologic Habitat | Geologic Controls |
| --- | --- | --- | --- | --- | --- | --- |
| ITG1_CV1a_22 | Etna | CV1a | Volcanic | Magma chamber | Active volcanism | Magmatic |

## Vesuvius

Mount Somma–Vesuvius is a stratovolcano classified as a Magmatic Extrusive Play (CV1a).

The volcano is currently considered quiescent, with its most recent eruption occurring in 1944. The area exhibits ongoing seismicity and fumarolic activity. The potential presence of geothermal resources has been investigated since the 1980s; however, the measured geothermal gradient has been found to be lower than the average continental value (~30 °C km⁻¹).

Additionally, the absence of signs of significant hydrothermal alteration in the rock samples from the volcanic edifice indicates minimal or no circulation of hydrothermal fluids in the system (Carlino et al., 2012).

| Geothermal Play Code | Geothermal Play Name | Conduction/Convection Type | Geothermal Play Type | Plate Tectonic Setting | Geologic Habitat | Geologic Controls |
| --- | --- | --- | --- | --- | --- | --- |
| ITF3_CV1a_23 | Vesuvius | CV1a | Volcanic | Magma chamber | Active volcanism | Magmatic |

## Ischia

Ischia is a volcanic island in the Tyrrhenian Sea, at the northern margin of the Gulf of Naples. Mount Epomeo, which rises to 787 m above sea level, is the central volcano-tectonic horst of the island. This structure is interpreted as the product of block uplift associated with the intrusion of a trachytic magma body approximately 33 ka ago (Carlino et al., 2012). The island is classified as a Magmatic Extrusive Play (CV1a), with the most recent eruption occurring in 1301–1302 AD.

The heat-flow distribution map by Della Vedova et al. (2001) highlights high-temperature convective systems beneath the island. Ischia currently hosts numerous fumaroles and thermal springs, with surface temperatures up to 100 °C, confirming the persistence of an active hydrothermal system (Buonasorte et al., 2011).

| Geothermal Play Code | Geothermal Play Name | Conduction/Convection Type | Geothermal Play Type | Plate Tectonic Setting | Geologic Habitat | Geologic Controls |
| --- | --- | --- | --- | --- | --- | --- |
| ITF3_CV1a_25 | Ischia | CV1a | Volcanic | Shallow magma chamber | Recent volcanism | Magmatic |

## Po basin and Venetian plain

The Po River Basin and the Veneto Plain are classified as a Foreland Basin play (CD2a). In these regions, subsurface temperatures typically align with the expected geothermal gradient, showing about 30–40 °C at 1 km depth, around 60 °C at 2 km, and between 70 and 80 °C at 3 km. However, locally elevated temperatures have been identified in both the inner sectors and along the margins of the sedimentary basins, where values exceed the regional average at comparable depths. These thermal anomalies are interpreted as resulting from local structural and hydrogeological controls that influence heat transport and fluid circulation (Buonasorte et al., 2011).

| Geothermal Play Code | Geothermal Play Name | Conduction/Convection Type | Geothermal Play Type | Plate Tectonic Setting | Geologic Habitat | Geologic Controls |
| --- | --- | --- | --- | --- | --- | --- |
| ITH5_CD2a_9 | Po basin and Venetian plain | CD2a | Orogenic belt | Foredeep + foreland basin | Hydrothermal | Fault/ Fractured controlled |

## Alps and Apennines

The Alpine and Apennine chains are classified as an Orogenic Belt play (CD2b).

In the northern Alps, thermal springs are relatively scarce and typically have low- to moderate-temperature waters. Hydrothermal circulation is primarily controlled by deep meteoric groundwater flow along fault systems, while local lithologic conditions, including carbonate aquifers, may influence reservoir properties (Luijendijk et al., 2020; Volpi et al., 2017; Pola et al., 2020). In the Western Alps, thermal springs are primarily linked to groundwater circulation through fractured crystalline rocks. A significant geothermal reservoir has been identified between the Western Alps and the Northern Apennines, beneath the sedimentary cover of the Tertiary Piedmont Basin (Pasquale et al., 2014). A comprehensive reconstruction of deep temperature distribution across the central Alpine belt remains limited by the scarcity of data. In the Southern Alps, however, deep boreholes indicate temperatures of approximately 50–60 °C at depths of around 2 km. A representative example is a well near Merano, where temperatures of about 40 °C at 1 km depth and up to 80 °C at 2 km depth have been recorded (Buonasorte et al., 2011). The temperature profile across the Apennine range shows clear spatial differences between the northern–central and southern parts. In the northern–central Apennines, temperatures gradually rise from the high-enthalpy geothermal zones in southern Tuscany to the surrounding sedimentary basins. Typically, temperatures are 40 to 50 °C at 1 km depth, increasing to 80–120 °C at around 3 km depth. In contrast, the southern Apennines display a temperature decrease from the Tyrrhenian coast toward the Adriatic foreland, with about 30 °C at 1 km and approximately 60 °C at 3 km depth. This thermal variation mainly results from meteoric water infiltration through permeable carbonate outcrops, enabling deep circulation and significantly cooling the subsurface (Buonasorte et al., 2011).

| Geothermal Play Code | Geothermal Play Name | Conduction/Convection Type | Geothermal Play Type | Plate Tectonic Setting | Geologic Habitat | Geologic Controls |
| --- | --- | --- | --- | --- | --- | --- |
| ITH2_CD2b_10 | Alps | CD2b | Orogenic belt | Fold and thrust belt | Hydrothermal | Fault/ Fracture controlled |
| ITI2_CD2b_11 | Apennines | CD2b | Orogenic belt | Fold and thrust belt | Hydrothermal | Fault/ Fracture controlled |

## Apulia and Hyblean foreland

The Apulian and Hyblean plateaus are onshore continental foreland domains at the margins of the Apennine–Maghrebian orogenic system. They developed as part of the foreland during the Cenozoic convergence between the African and Eurasian plates.

The Apulian Plateau consists of a thick Mesozoic platform carbonate sequence, exceeding 6 km in thickness, that overlies a Variscan crystalline basement. The exposed lithologies are predominantly Jurassic–Cretaceous carbonates. Similarly, the Hyblean Plateau is composed of a thick Mesozoic–Cenozoic carbonate succession resting on a continental basement of uncertain age, with an overall sedimentary thickness of approximately 6 km (Billi et al., 2005).

In the Apulian and Hyblean foreland domains, heat-flow maps (Della Vedova et al., 2001) indicate the presence of low-temperature convective and/or advective systems, often associated with deep infiltration of meteoric water.

| Geothermal Play Code | Geothermal Play Name | Conduction/Convection Type | Geothermal Play Type | Plate Tectonic Setting | Geologic Habitat | Geologic Controls |
| --- | --- | --- | --- | --- | --- | --- |
| ITF4_CD2a_12 | Apulia and Hyblean foreland | CD2a | Orogenic belt | Foreland basin | Hydrothermal | Fault/ Fractured controlled |

## Euganean Hills

The Euganean Hills cover approximately 25 km² southwest of the city of Padua in the central Veneto region. The area includes the municipalities of Abano Terme, Montegrotto Terme, Battaglia Terme, and Galzignano Terme. Euganean thermal waters are among Italy's most important and economically viable low-enthalpy geothermal resources. These waters have been exploited since Roman times, primarily for balneological and recreational purposes, supplying approximately 240 thermal pools, and secondarily for heating thermal facilities and supporting greenhouse-based floriculture and aquaculture (Fabbri et al., 2017).

The thermal waters are of meteoric origin, with recharge areas located in the Veneto Prealps to the north of the area. Fluid circulation is facilitated by the high-permeability damage zone associated with the Schio–Vicenza Fault. This structure belongs to a regional system of high-angle faults trending NW–SE to NNW–SSE and dipping toward the NE, extending for approximately 120 km beneath the central Veneto Plain (Fabbri et al., 2017).

The geothermal system is driven by regional crustal heat flow (70–80 mW m⁻²), enhanced by convective processes related to localized high permeability, and by radiogenic heat production associated with volcanic bodies in the Euganean area. These combined processes heat the circulating waters to temperatures of up to ~100 °C at depths of around 1 km (Fabbri et al., 2017).

| Geothermal Play Code | Geothermal Play Name | Conduction/Convection Type | Geothermal Play Type | Plate Tectonic Setting | Geologic Habitat | Geologic Controls |
| --- | --- | --- | --- | --- | --- | --- |
| ITH3_CD2a_14 | Euganean Hills | CD2a | Foreland basin | Foredeep + foreland basin | Hydrothermal | Fault/ Fractured controlled |

## Grado

The island of Grado lies within the lagoonal system of the Friuli Venezia Giulia plain in the province of Gorizia. This plain is the eastern extension of the Po Basin and is classified as a Foreland Basin play (CD2a). Elevated carbonate platform structures are inferred to host porous, fractured hydrothermal reservoirs that enable convective circulation of geothermal fluids in the shallow subsurface (approximately the upper 1–2 km). In these zones, fluid flow is primarily controlled by structural discontinuities that enhance permeability and promote localized hydrothermal circulation. Convective circulation within the underlying carbonate reservoirs produces localized thermal anomalies that propagate into the overlying sedimentary succession. In these sediments, heat transfer occurs predominantly by conduction, warming shallow freshwater aquifers. In this framework, Neogene–Paleogene marl sequences act as a regional low-permeability seal, forming an effective hydraulic barrier (Della Vedova et al., 2014).

| Geothermal Play Code | Geothermal Play Name | Conduction/Convection Type | Geothermal Play Type | Plate Tectonic Setting | Geologic Habitat | Geologic Controls |
| --- | --- | --- | --- | --- | --- | --- |
| ITH4_CD2a_15 | Grado | CD2a | Orogenic belt | Foreland basin | Hydrothermal | Fault/ Fractured controlled |

## Milano

The city of Milan lies in the northern sector of the Po Basin (northern Italy), which forms the foreland basin of the Alpine collisional system. The subsurface contains up to ~800 m of marine and continental deposits, including alluvial fan (conoid) sediments overlain by unconsolidated fluvio-glacial and floodplain deposits derived from Alpine drainage systems. The area is classified as a Foredeep/Foreland Basin play (CD2a). Hydrogeological investigations have identified three main aquifer systems (from shallow to deep). The upper unconfined (phreatic) aquifer, 20–50 m thick, consists mainly of gravels with a sandy matrix. It is separated by a low-permeability clayey–silty aquitard (2–5 m thick) from an underlying semi-confined aquifer (50–100 m thick), composed of sands and sandy gravels. A deeper confined aquifer system occurs below, hosted within finer-grained sandy and silty–clayey units (Previati et al., 2022). Groundwater from the shallow aquifer system, with temperatures of approximately 13–15 °C, is widely exploited for low-enthalpy geothermal applications, including district heating and cooling (Buonasorte et al., 2011).

| Geothermal Play Code | Geothermal Play Name | Conduction/Convection Type | Geothermal Play Type | Plate Tectonic Setting | Geologic Habitat | Geologic Controls |
| --- | --- | --- | --- | --- | --- | --- |
| ITC4_CD2a_16 | Milano | CD2a | Orogenic belt | Foredeep + Foreland basin | Hydrothermal | Fault/ Fractured controlled |

## Ferrara

The municipality of Ferrara, located in northern Italy, lies within the Po Basin and is classified as a Foreland Basin play (CD2a). Since the early 1990s, the city has exploited a low- to medium-enthalpy geothermal reservoir at depths of about 1 km, producing fluids at temperatures near 100 °C for the district heating (DH) network (Manente et al., 2019). The geothermal system occurs within permeable sedimentary units of the Po Basin, where fluid circulation is controlled by stratigraphic heterogeneity and structural features that enhance permeability. Heat is primarily supplied by the regional geothermal gradient, with convection locally increasing heat-transfer efficiency. The resource is characterized by a water-dominated system typical of foreland basin settings (Buonasorte et al., 2011; Manente et al., 2019).

The DH system is supplied by a geothermal plant located approximately 7 km northwest of the city center and is distributed through a network of about 80 km. The network serves a large number of residential, public, and commercial buildings, with a total heated floor area of approximately 1.9 million m². This makes Ferrara one of the most significant examples of geothermal district heating use in Italy. The geothermal source is a significant component of the system; however, heat demand is met through an integrated energy mix that also includes waste-to-energy (municipal solid waste) plants and auxiliary natural gas boilers, particularly during peak winter demand (Manente et al., 2019).

| Geothermal Play Code | Geothermal Play Name | Conduction/Convection Type | Geothermal Play Type | Plate Tectonic Setting | Geologic Habitat | Geologic Controls |
| --- | --- | --- | --- | --- | --- | --- |
| ITH5_CD2a_17 | Ferrara | CD2a | Orogenic belt | Foreland basin | Hydrothermal | Fault/ Fractured controlled |

## Sardinia

The Sardinian microplate constitutes part of the Variscan basement, which has experienced various levels of metamorphism and has been intruded by Carboniferous–Permian granitoids from the Corsica–Sardinia batholith. This basement is locally overlain by sedimentary (mainly carbonate) and volcanic successions dating from the Permian to the Neogene, with thicknesses reaching up to 2–3 km in some basins (Paternoster et al., 2017). Fluid circulation within these systems is largely controlled by tectonic structures, as geochemical studies show, emphasizing the importance of fractures in enabling deep fluid ascent (Angelone et al., 2005).

Within this geological framework, Sardinia is classified as a Basement Play (CD3), with geothermal potential mainly linked to fractured crystalline rocks and intrusive bodies.

| Geothermal Play Code | Geothermal Play Name | Conduction/Convection Type | Geothermal Play Type | Plate Tectonic Setting | Geologic Habitat | Geologic Controls |
| --- | --- | --- | --- | --- | --- | --- |
| ITG2_CD3_19 | Sardinia | CD3 | Basement type | Heat producting element rock | Petrothermal | Fault/ Fracture controlled |

## Calabrian Arc, Sicily, and SW Sicily

The Calabrian Arc is a curved orogenic system extending from the southern Apennines to the Sicilian Maghrebides, formed by the subduction of the Ionian lithosphere beneath the central Mediterranean. Its present configuration reflects a complex tectonic evolution driven by slab rollback and arc migration (Cifelli et al., 2008). The Calabrian Basal Complex comprises Hercynian crystalline units overlain by Alpine metamorphic assemblages, forming a highly tectonized sequence that locally overlies Triassic carbonate units exposed in tectonic windows along the arc's Tyrrhenian side (Van Dijk et al., 2000).

In northeastern Sicily, the Peloritanian Units dominate as the highest structural component of the Sicilian chain. These units feature a stack of thin continental nappes that dip southward and are bounded by low-temperature shear zones exhibiting cataclastic to mylonitic deformation. They mainly consist of Variscan metamorphic rocks (~314 Ma, as dated by Rb/Sr methods), with some intrusions of Late Variscan plutonic bodies (~292 Ma), and are overlain by a Mesozoic–Cenozoic sedimentary cover (Aldega et al., 2011).

In the western sector of Sicily, the subsurface primarily consists of Mesozoic carbonate platform successions and their associated clastic covers, dating from the Cretaceous to the Miocene (Montanari et al., 2017). These carbonate units are overlain by Miocene–Pleistocene clastic–terrigenous deposits linked to foreland and wedge basin sedimentation, serving as a regional cover for the geothermal system. In this geological framework, geothermal circulation is mainly hosted within the carbonate units, while the overlying terrigenous deposits provide an effective seal. Most thermal springs are located along the margins of carbonate outcrops, particularly near their contact with the terrigenous cover. Borehole data and hydrothermal manifestations indicate the presence of positive heat-flow and temperature anomalies at depth along the coastal zone, especially between Marsala and Agrigento (Montanari et al., 2017).

The Calabrian Arc and the eastern sectors of Sicily are classified as Basement Plays (CD3), whereas the western sector of Sicily is classified as an Orogenic Belt play (CD2b).

| Geothermal Play Code | Geothermal Play Name | Conduction/Convection Type | Geothermal Play Type | Plate Tectonic Setting | Geologic Habitat | Geologic Controls |
| --- | --- | --- | --- | --- | --- | --- |
| ITF6_CD3_20 | Calabrian Arc | CD3 | Basement type | Heat producting element rock | Petrothermal | Fault/ Fracture controlled |
| ITG1_CD3_21 | Sicily | CD3 | Basement type | Heat producting element in rock | Petrothermal | Fault/ Fracture controlled |
| ITG1_CD2b_26 | SW Sicily | CD2b | Orogenic belt | Fold and thrust belt | Hydrothermal | Fault/ Fracture controlled |

## Guardia Lombardi

This area lies within a tectonically complex segment of the Southern Apennines. The structural setting is characterized by buried thrust-related folds developed during the Pliocene Apennine orogeny, later affected by extensional faulting during the Pleistocene.

The geothermal reservoir is hosted within fractured Cretaceous–Eocene limestones of the Apulian carbonate platform and contains fluids at approximately 120–125 °C at depths of ~3 km. In the study area, the reservoir is organized into several structural culminations; the shallowest is located at a depth of approximately −1125 m below ground level (~250 m above sea level) in the Monte Forcuso 1 well. Reservoir fluids consist mainly of CO₂-rich gas and brackish water. The Monte Forcuso structural high is characterized by the presence of a CO₂ gas cap extending over several hundred meters. Analysis of well logs allows the areal extent and depth of this gas cap to be constrained. Along the flanks of the Monte Forcuso culmination and in deeper structural highs (e.g., the Bonito 1 well), the CO₂ cap is absent, and the reservoir is instead dominated by saline water (Inversi et al. 2013).

| Geothermal Play Code | Geothermal Play Name | Conduction/Convection Type | Geothermal Play Type | Plate Tectonic Setting | Geologic Habitat | Geologic Controls |
| --- | --- | --- | --- | --- | --- | --- |
| ITF3_CD2b_27 | Guardia Lombardi | CD2b | Orogenic belt | Fold and thrust belt | Hydrothermal | Fault/ Fractured controlled |

# References

Aldega L, Corrado S, Di Paolo L, Somma R, Maniscalco R, Balestrieri ML. Shallow burial and exhumation of the Peloritani Mountains (NE Sicily, Italy): insight from paleothermal and structural indicators. Geol Soc Am Bull. 2011;123(1–2). doi:10.1130/B30093.1.

Angelone M, Gasparini C, Guerra M, Lombardi S, Pizzino L, Quattrocchi F. Fluid geochemistry of the Sardinian Rift–Campidano Graben (Italy): fault segmentation and implications for tectonics and CO₂ storage. Appl Geochem. 2005;20(2):385–402. doi:10.1016/j.apgeochem.2004.08.008.

Barelli A, Cei M, Romagnoli P. Geothermal resources and exploitation in the Mount Amiata area (Italy). In: Proceedings of the World Geothermal Congress 2010; 2010 Apr 25–29; Bali, Indonesia.

Barreca G, Branca S, Monaco C. Three-dimensional modeling of Mount Etna volcano: volume assessment, trend of eruption rates, and geodynamic significance. Tectonics. 2018;37(3):842–857.

Belkin HE, McAleer RJ, De Vivo B. Ore mineralization in the Mofete and San Vito geothermal fields, Campi Flegrei volcanic complex, Naples, Italy. J Geochem Explor. 2024;107556.

Billi A. Attributes and influence on fluid flow of fractures in foreland carbonates of southern Italy. J Struct Geol. 2005;27(9):1630–1643.

Buonasorte G, Cataldi R, Passaleva G. Geothermal development in Italy: from present to future. In: Proceedings of the European Geothermal Congress 2007; 2007 May 30–Jun 1; Unterhaching, Germany.

Buonasorte G, Cataldi R, Franci T, Grassi W, Manzella A, Meccheri M, Passaleva G. Previsioni di crescita della geotermia in Italia fino al 2030 per un nuovo manifesto della geotermia in Italia. Il calore della Terra. UGI – Unione Geotermica Italiana; 2011. Available from: https://www.unionegeotermica.it/pdfiles/UGI_Stime_geotermia_2030.pdf

Carlino S, Somma R, Troise C, De Natale G. The geothermal exploration of Campanian volcanoes: historical review and future development. Renew Sustain Energy Rev. 2012;16(1):1004–1030.

Chiodini G, Caliro S, Avino R, Bagnato E, Capecchiacci F, Carandente A, Cardellini C, Minopoli C, Tamburello G, Tripaldi S, Aiuppa A. The hydrothermal system of the Campi Flegrei caldera, Italy. In: Active Volcanoes of the World. Springer; 2022. doi:10.1007/978-3-642-37060-1_9.

Cifelli F, Mattei M, Della Seta M. Calabrian Arc oroclinal bending: the role of subduction. Tectonics. 2008;27(5).

Ciotoli G, Della Seta M, Del Monte M, Fredi P, Lombardi S, Palmieri EL, Pugliese F. Morphological and geochemical evidence of neotectonics in the volcanic area of Monti Vulsini (Latium, Italy). Quat Int. 2003;101:103–113.

Della Vedova B, Bellani S, Pellis G, Squarci P. Deep temperatures and surface heat flow distribution. In: Vai GB, Martini IP, editors. Anatomy of an Orogen: the Apennines and Adjacent Mediterranean Basins. Dordrecht: Springer; 2001. p. 65–76. doi:10.1007/978-94-015-9829-3_7.

Della Vedova B, Castelli E, Brancatelli G, Aurelie C. Geothermal heating and cooling in the FVG region: the Grado district heating and the Pontebba ice rink plants. In: Proceedings of Geothermal Energy; 2014.

Fulignati P, Marianelli P, Sbrana A, Ciani V. 3D geothermal modelling of the Mt. Amiata hydrothermal system in Italy. Energies. 2014;7:7434–7453. doi:10.3390/en7117434.

Inversi B, Scrocca D, Montegrossi G, Livani M, Petracchini L, Brandano M, Testa B. 3D geological modelling of a fractured carbonate reservoir for the study of medium enthalpy geothermal resource in the Southern Apennines (Campania Region, Italy). In: Extended abstract, European Geothermal Congress; 2013 Jun.

Luijendijk E, Winter T, Köhler S, Ferguson G, von Hagke C, Scibek J. Using thermal springs to quantify deep groundwater flow and its thermal footprint in the Alps and a comparison with North American orogens. Geophys Res Lett. 2020;47:e2020GL090134. doi:10.1029/2020GL090134.

Manente G, Lazzaretto A, Molinari I, Bronzini F. Optimization of the hydraulic performance and integration of heat storage in the geothermal and waste-to-energy district heating system of Ferrara. J Clean Prod. 2019;230:869–887.

Marani M, Gamberi F, Leidi E, Mercorella A, Rovere M, Ferrante V. Geohazard features of the central–southern Tyrrhenian seamounts. J Maps. 2024;20(1):2359973.

Marini L, Principe C, Lelli M. Time changes during the last 40 years in the Solfatara magmatic–hydrothermal system (Campi Flegrei, Italy): new conceptual model and future scenarios. Solid Earth. 2025;16:551–578. doi:10.5194/se-16-551-2025.

Montanari D, Ruggieri G, Bonini M, Balestrieri ML. First application of low temperature thermochronology as a tool for geothermal exploration: a promising preliminary test from the Larderello–Travale geothermal field (Italy). Geothermics. 2023;107:102603. doi:10.1016/j.geothermics.2022.102603.

Montanari D, Minissale A, Doveri M, Gola G, Trumpy E, Santilano A. Geothermal resources within carbonate reservoirs in western Sicily (Italy): a review. Earth Sci Rev. 2017;169:180–201. doi:10.1016/j.earscirev.2017.04.016.

Pasquale V, Verdoya M, Chiozzi P. Heat flow and geothermal resources in northern Italy. Renew Sustain Energy Rev. 2014;36:277–285. doi:10.1016/j.rser.2014.04.075.

Paternoster M, Oggiano G, Sinisi R, Caracausi A, Mongelli G. Geochemistry of two contrasting deep fluids in the Sardinia microplate (western Mediterranean): relationships with tectonics and heat sources. J Volcanol Geotherm Res. 2017;336:108–117. doi:10.1016/j.jvolgeores.2017.02.011.

Peccerillo A. The Aeolian arc. In: Cenozoic volcanism in the Tyrrhenian Sea region. 2017. p. 217–263.

Pola M, Cacace M, Fabbri P, Piccinini L, Zampieri D, Torresan F. Fault control on a thermal anomaly: conceptual and numerical modeling of a low-temperature geothermal system in the Southern Alps foreland basin (NE Italy). J Geophys Res Solid Earth. 2020;125:e2019JB017394. doi:10.1029/2019JB017394.

Previati A, Epting J, Crosta GB. The subsurface urban heat island in Milan (Italy): a modeling approach covering present and future thermal effects on groundwater regimes. Sci Total Environ. 2022;810:152119.

Romagnoli P, Arias A, Barelli A, Cei M, Casini M. Updated numerical model of the Larderello–Travale geothermal system. Geothermics. 2010;39(4):292–313. doi:10.1016/j.geothermics.2010.09.010.

Santilano A, Manzella A, Gianelli G, Donato A, Gola G, Nardini I, et al. Convective intrusive geothermal plays: the role of tectonics. Geotherm Energy Sci. 2015;3(1):51–62. doi:10.5194/gtes-3-51-2015.

Sbrana A, Marianelli P, Belgiorno M, Sbrana M, Ciani V. Natural CO₂ degassing in the Mt. Amiata volcanic–geothermal area. J Volcanol Geotherm Res. 2020;397:106852. doi:10.1016/j.jvolgeores.2020.106852.

Siniscalchi A, Tripaldi S, Romano G, Chiodini G, Improta L, Petrillo Z, D’Auria L, Caliro S, Avino R. Reservoir structure and hydraulic properties of the Campi Flegrei geothermal system inferred by audiomagnetotelluric, geochemical, and seismicity data. J Geophys Res Solid Earth. 2019;124(7):6786–6804. doi:10.1029/2018JB016514.

Van Dijk JP, Bello M, Brancaleoni GP, Cantarella G, Costa V, Frixa A, et al. A regional structural model for the northern sector of the Calabrian Arc (southern Italy). Tectonophysics. 2000;324(4):267–320.

Volpi G, Magri F, Frattini P, Crosta GB, Riva F. Groundwater-driven temperature changes at thermal springs in response to recent glaciation: Bormio hydrothermal system, Central Italian Alps. Hydrogeol J. 2017;25:1569–1585. doi:10.1007/s10040-017-1600-6.

Wright JV. Stratigraphy and geology of the welded air-fall tuffs of Pantelleria, Italy. Geol Rundsch. 1980;69:263–291. doi:10.1007/BF01869037.

# Level 2

| Name of Reservoir | Reservoir Code | Purpose* | Geologic  Context | Geologic Habitat | Reservoir Period | Lithology |
| --- | --- | --- | --- | --- | --- | --- |
| Larderello shallow | ITI1_CV2b_006_P001 | GP | Post-orogenic  phase | Hydrothermal | Triassic | Carbonate and evaporite rocks |
| Larderello deep | ITI1_CV2b_006_P002 | GP | Post-orogenic  phase | Hydrothermal | Paleozoic | Metamorphic  rocks |
| Mt. Amiata shallow | ITI1_CV2b_005_P001 | GP | Post-orogenic  phase | Hydrothermal | Triassic | Carbonate and evaporite rocks |
| Mt. Amiata deep | ITI1_CV2b_005_P002 | GP | Post-orogenic  phase | Hydrothermal | Paleozoic | Metamorphic  rocks |
| Mts. Sabatini | ITI4_CV1a_004_P001 | GP | Post-orogenic  phase | Active magmatism (volcanism) | Triassic | Carbonate  rocks |
| Mts. Vulsini | ITI4_CV1a_004_P002 | GP | Post-orogenic  phase | Active magmatism (volcanism) | Triassic | Carbonate  rocks |
| Phlegrean Fields | ITF3_CV1a_003_P001 | GP | Post-orogenic  phase | Active magmatism (volcanism) | Quaternary | Volcanic  rocks |
| Ischia | ITF3_CV1a_025_P001 | GP | Post-orogenic  phase | Active magmatism (volcanism) | Quaternary | Volcanic  rocks |
| Vulcano Island | ITG1_CV1a_002_P001 | GP | Magmatic arcs | Active magmatism (volcanism) | Quaternary | Volcanic  rocks |
| Catania SW | ITI2_CD2a_011_P001 | GP/HS | Foreland basins | Hydrothermal | Neogene | Silicoclastic  rocks |
| Mazara del Vallo | ITG1_CD2b_026_P001 | GP/HS | Fold-and-thrust belts | Hydrothermal | Mesozoic | Carbonate  rocks |
| Pantelleria | ITG1_CV1a_001_P001 | GP/HS | Mid oceanic ridges | Active magmatism (volcanism) | Quaternary | Volcanic  rocks |
| Guardia Lombardi | ITF3_CD2b_027_P001 | GP | Fold-and-thrust belts | Hydrothermal | Cretaceous | Carbonate  rocks |
| Ferrara | ITH5_CD2a_017_P001 | GP | Foreland basins | Hydrothermal | Cretaceous | Carbonate  rocks |
| Grado | ITH4_CD2a_015_P001 | GP/HS | Foreland basins | Hydrothermal | Cretaceous | Carbonate  rocks |
| Milano | ITC4_CD2a_016_P001 | GP/HS | Foreland basins | Hydrothermal | Neogene | Silicoclastic  rocks |
| Monticelli Terme | ITH5_CD2a_009_P001 | GP/HS | Foreland basins | Hydrothermal | Neogene | Silicoclastic  rocks |

**GP = Geothermal Potential; HS = Heat Storage*
